# Supplementary material
Source: PubMed Central journal article supplement (PMC2716120)
Supplement: NIHMS109510-supplement-supplement.pdf [file NIHMS109510-supplement-supplement.pdf]

Cell, *Volume 136*

**Supplemental Data**

**Ezh2 Orchestrates Gene Expression for the Stepwise Differentiation  
of Tissue-Specific Stem Cells**

**Elena Ezhkova, H. Amalia Pasolli, Joel S. Parker, Nicole Stokes, I-hsin Su,  
Gregory Hannon, Alexander Tarakhovsky, and Elaine Fuchs**

## Supplemental Figures

### Supplementary Figure 1

Ezhkova et al

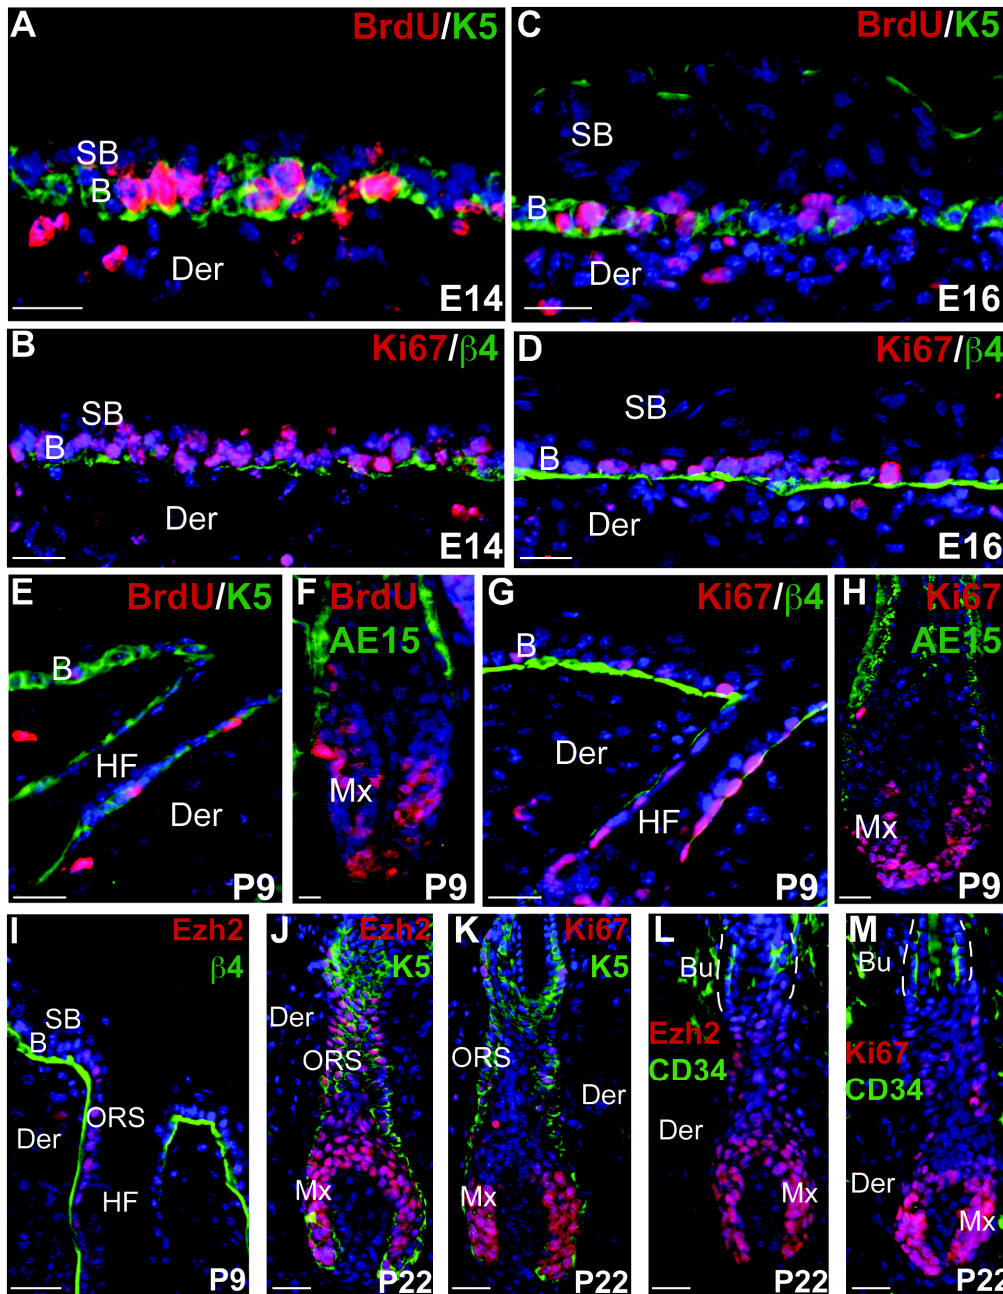

**Figure S1. Ezh2 Colocalizes with Highly Proliferative Cells in the Epidermis**

(A and B) Both basal (B) and suprabasal (SB) cells are proliferative at E14 as shown by immunofluorescent microscopy using BRDU and Ki67 antibodies. (A to H) Proliferation of basal cells wanes as epidermis matures as shown by immunofluorescent staining

with BRDU and Ki67 antibodies at indicated ages. Matrix (Mx) and outer root sheath (ORS) of hair follicle (HF) contain proliferative cells. (I to M) Ezh2 is maintained postnatally in the proliferative (Ki67+) cells of the hair follicle ORS and Mx, but not the quiescent follicle stem cells within the CD34(+) bulge. Thus, in both the developing epidermis and hair follicle, Ezh2 correlated with an undifferentiated, proliferative state. Abbreviations are as follows: Der, dermis; K5, keratin 5;  $\beta$ 4,  $\beta$ 4 integrin. Scale bar is 30 $\mu$ m.

### Supplementary Figure 2

Ezhkova et al

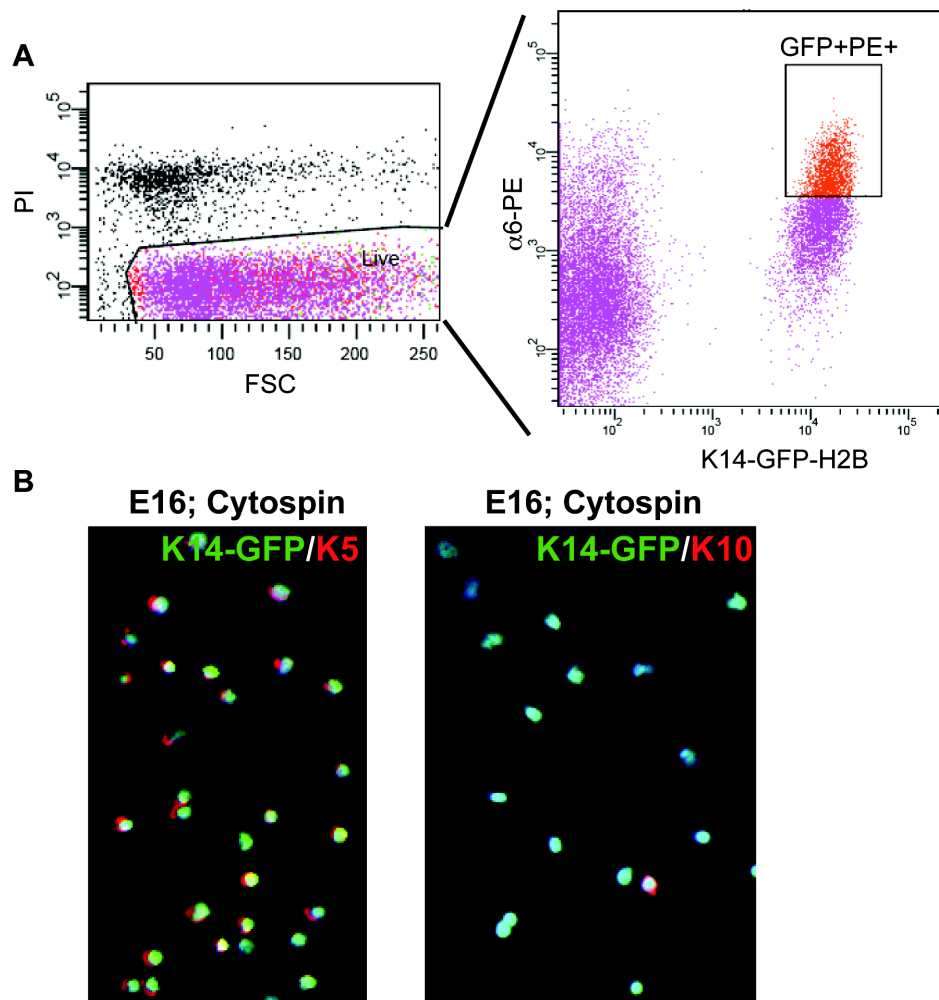

## Figure S2. Scheme of Purification of Basal Cells for *In Vivo* ChIP Analysis

(A) Scheme of FACS purification of basal layer (BL) cells from E16 embryos that express GFP-tagged histone H2B under promoter of basal layer *keratin 14* gene. Cells were stained with propidium iodide (PI) to exclude dead cells (left) and with antibodies against  $\alpha 6$  integrin ( $\alpha 6$ ) conjugated to fluorescent dye PE (right). Gating was done on  $\alpha 6$  integrin positive and K14-GFP positive basal cells. (B) Immunofluorescent stainings on cytopins of FACS isolated basal cells with basal Keratin 5 (K5) and spinous Keratin 10 (K10) layer markers confirms purity of a sorted population. A few basal cells that initiated program of terminal differentiation, but did not downregulate basal markers are K14-GFP and K10 positive.

### Supplementary Figure 3

Ezhkova et al

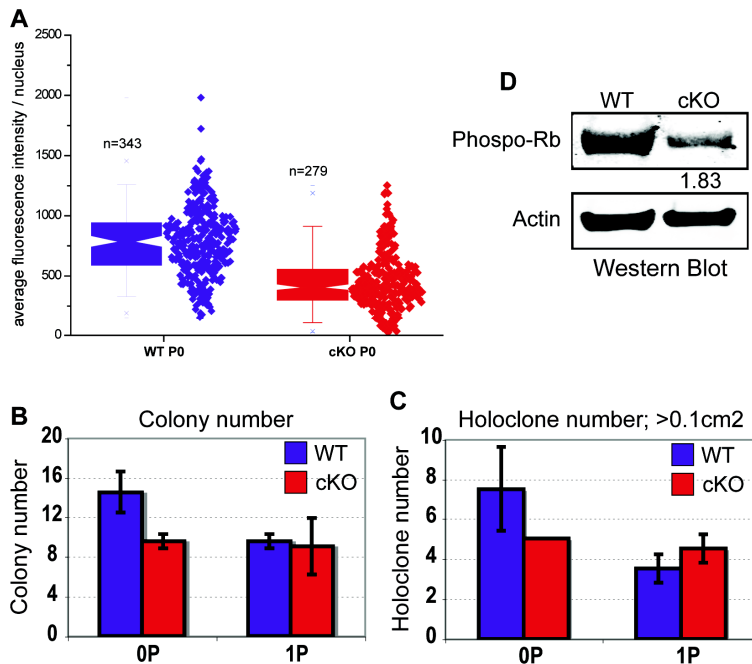

### Figure S3. Loss of Ezh2 in Basal Cells Leads to Proliferation Defect

(A) Average fluorescent intensity for triMeK27-H3 in nuclei of P0 Ezh2cKO and WT basal cells shows reduction of this histone mark in Ezh2cKO basal cells. (B and C) Colony in B and holoclone in C forming efficiency are unchanged in Ezh2cKO vs WT cells analyzed at different passages. (D) Level of phosphorylated Retinoblastoma (phospho-Rb) protein is reduced more than two fold in Ezh2cKO cells compared to WT.

Supplementary Figure 4

Ezhkova et al

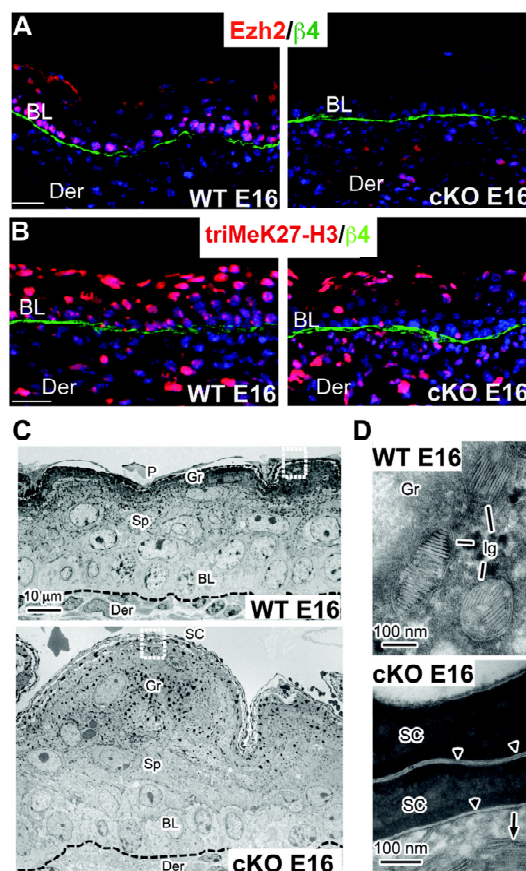

### Figure S4. Epidermal Differentiation Is Accelerated in Ezh2cKO E16 Mice

(A and B) Immunofluorescence confirms the absence of Ezh2 and triMeK27-H3 in E16 Ezh2cKO basal cells. (C) Electron microscopy analysis reveals acceleration in epidermal development in Ezh2cKO mice as shown by the presence of several layers of

granular cells and stratum corneum, whereas WT had thinner granular layer and lacked stratum corneum. **(D)** Fixation of skin with ruthenium tetroxide to preserve lipid structure reveals that lamellar granules (lg) are observed in both WT and Ezh2cKO epidermis while the highly ordered tracks of alternating electron-dense and electron-lucent lipid lamellae interconnecting stratum corneum cells are present only in the Ezh2cKO. Scale bar is 30 $\mu$ m.

**Supplementary Figure 5**

**Ezhkova et al**

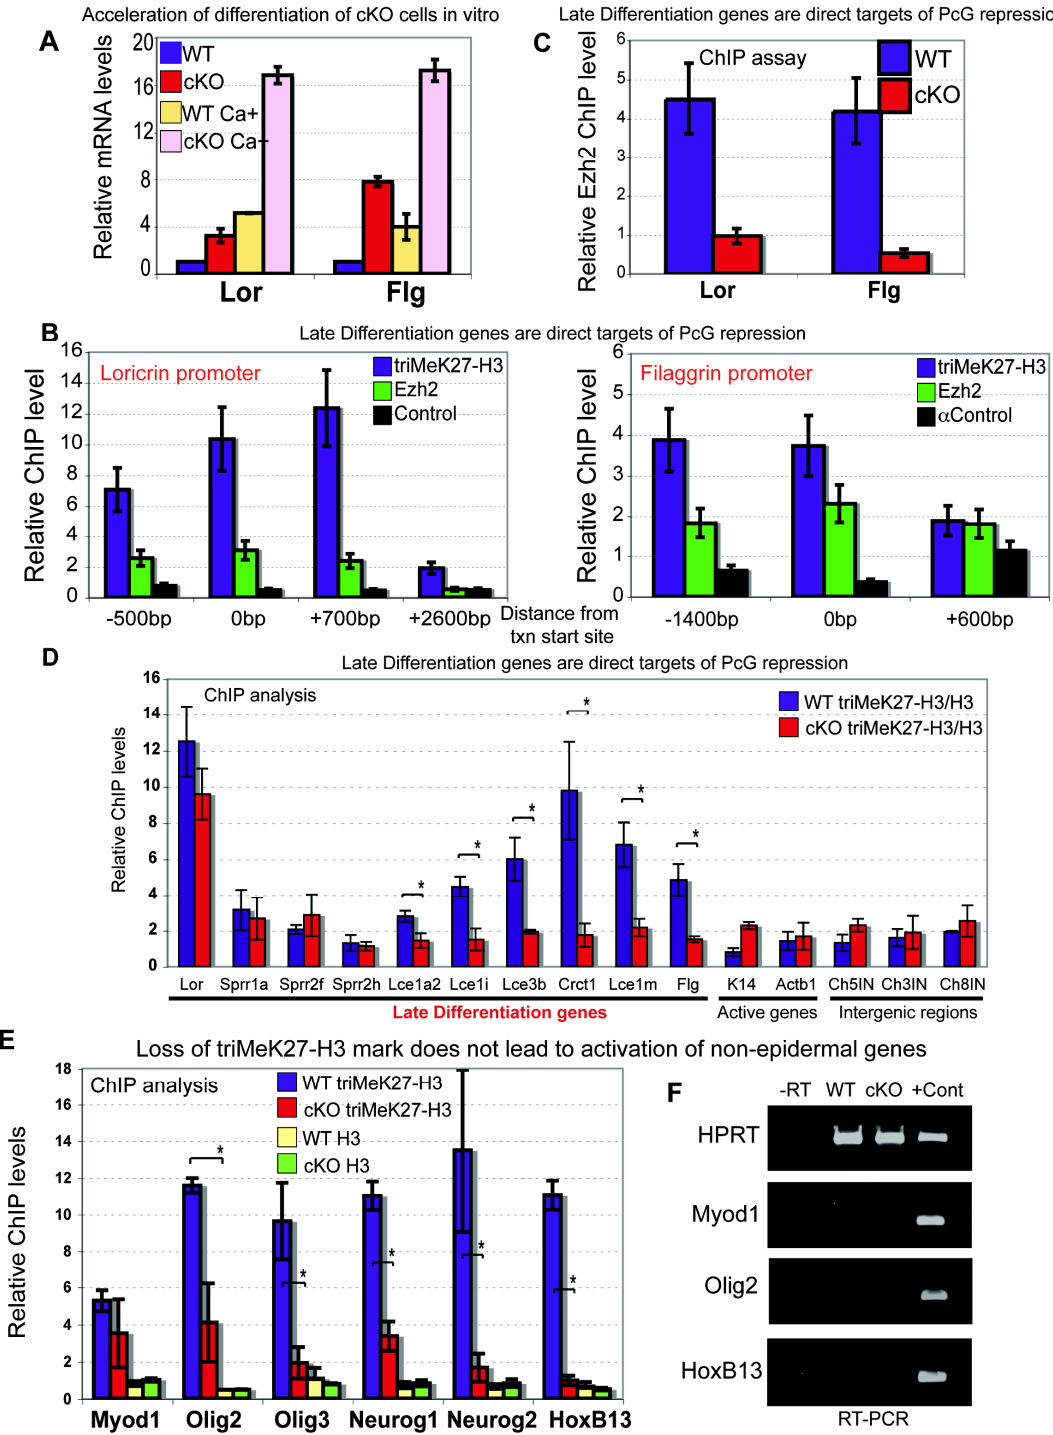

### Figure S5. Late Differentiation Genes Are Direct Targets of Ezh2 Repression

(A) Semi-quantitative RT-PCR of mRNAs from WT and Ezh2cKO cultures  $\pm$  Ca<sup>+</sup> (24hr) shows induced terminal differentiation. Semi-quantitative RT-PCR with primers against the *HPRT* gene is used for normalization. (B) ChIP analysis of association of Ezh2 and triMeK27-H3 with *loricrin* (left) and *filaggrin* (right) promoters shows their enrichment around transcriptional (txn) start sites (0bp). Immunoprecipitation with no antibodies (Control) serves as a negative control. (C) ChIP analysis revealed reduction of Ezh2 at promoters of *loricrin* and *filaggrin* genes in Ezh2cKO cells. (D) ChIP analysis of triMeK27-H3 signal normalized to total histone H3 level at late differentiation genes shows reduction of this mark at most EDC genes in Ezh2cKO cells compared to WT. Data are mean  $\pm$ st. dev. N=2. Asterisks indicate significance,  $p < 0.05$ . Normalization of triMeK27-H3 signal over bulk H3 showed no statistically significant reduction at *Loricrin* gene due to reduction in the level of total histone H3 at this gene. (E) ChIP analysis revealed reduction of the triMeK27-H3 mark at non-epidermal genes in Ezh2cKO cells. Data are mean  $\pm$ st. dev. N=2. Asterisks indicate significance,  $p < 0.05$ . Semi-quantitative PCR with primers against the promoter of basal *keratin 5* gene was used for normalization in C-E. (F) RT-PCR analysis revealed that loss of triMeK27-H3 at promoters of non-epidermal genes did not result in their activation. PCR with RNA as a template served as a negative control (-RT). RT-PCR with RNA isolated from skeletal muscle or brain served as a positive control (+Control). Control is HPRT (unchanged).



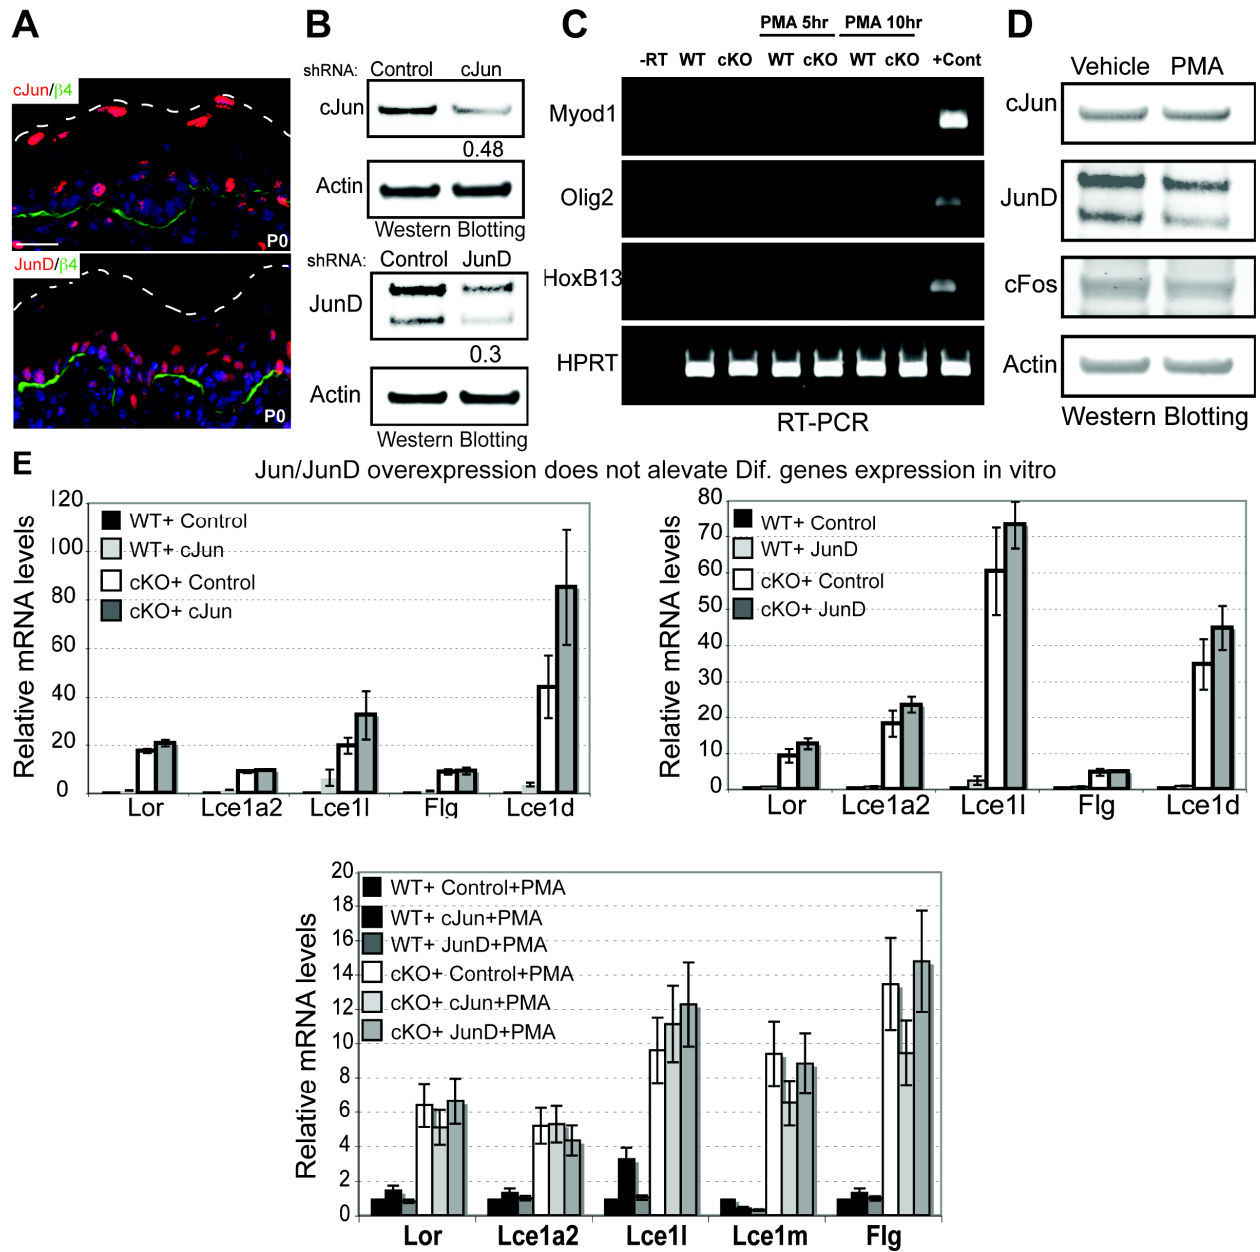

**Figure S6. AP1 Family Members Control Late Differentiation Gene Expression in Ezh2cKO Cells**

(A) Immunofluorescent studies revealed expression of AP1 family members, cJun and JunD, in both basal and suprabasal cells of WT P0 epidermis. Note upregulation of cJun expression in late differentiation layers of the epidermis. (B) Efficiency of RNAi

knockdown of cJun and JunD proteins analyzed by Western Blotting. **(C)** RT-PCR analysis revealed that PMA treatment of either WT or Ezh2cKO cells did not result in upregulation of *Myod1*, *Olig2*, or *HoxB13* genes. PCR with RNA as a template served as a negative control (-RT). RT-PCR with RNA isolated from skeletal muscle or brain served as a positive control (+Control). Control is HPRT (unchanged). **(D)** Levels of Ap1 proteins are unchanged upon PMA treatment as revealed by Western Blotting. Control is actin (unchanged) in A and D. **(E)** Overexpression of either cJun or JunD  $\pm$ PMA treatment does not lead to changes in expression of late differentiation genes as revealed by semi-quantitative RT-PCR. Semi-quantitative RT-PCR with primers against the *HPRT* gene was used for normalization.

**Supplementary Figure 7**

**Ezhkova et al**

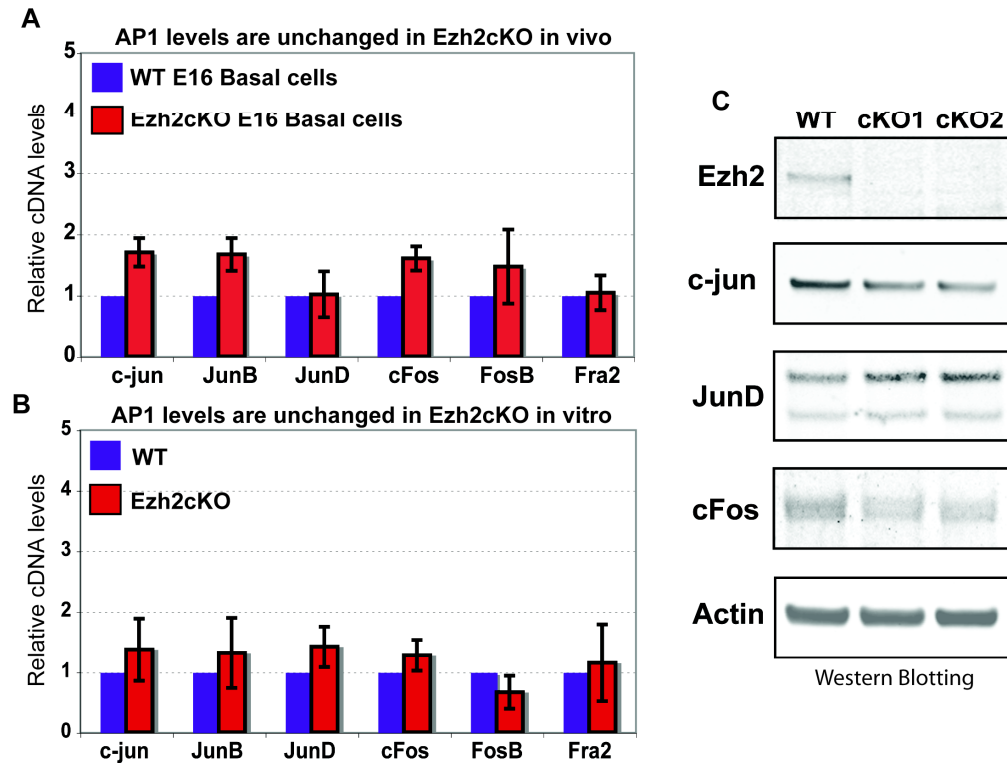

**Figure S7. AP1 Levels Are Unchanged in Ezh2cKO Compared to WT Cells *In Vivo* and *In Vitro***

(**A-C**) Semi-quantitative RT-PCR (**A** and **B**) and Western Blotting (**C**) analyses showed no significant changes in expression of Ap1 family members between WT and Ezh2cKO cells *in vivo* and *in vitro*. Semi-quantitative RT-PCR with primers against the *HPRT* gene was used for normalization.

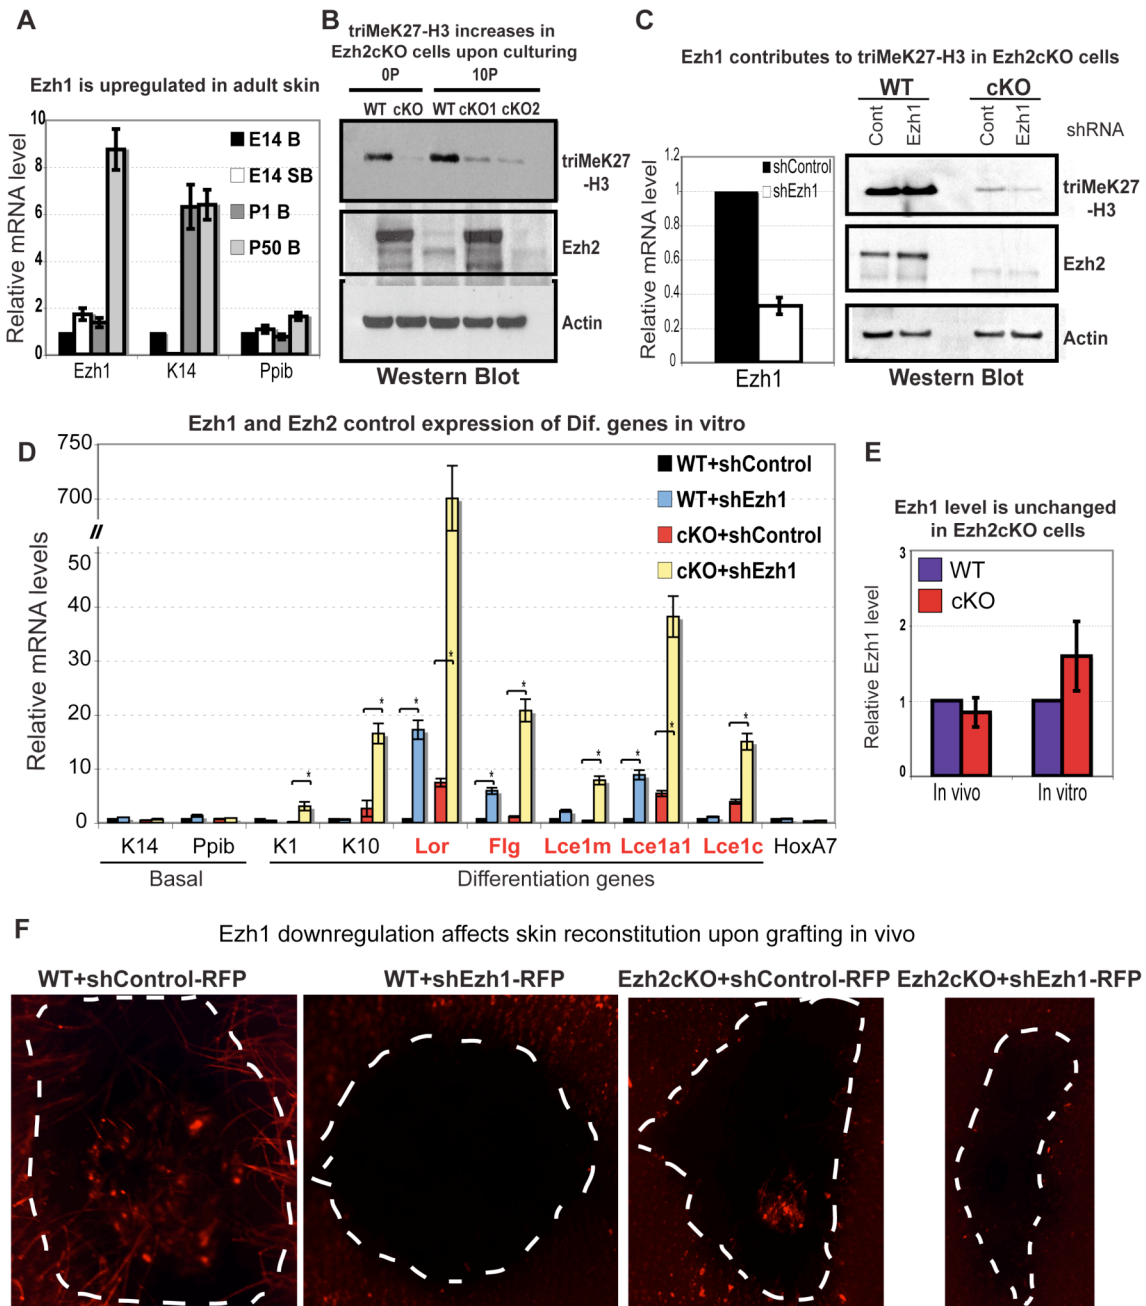

**Figure S8. Ezh2 paralogue, Ezh1, Is a New Histone H3 Lysine 27 Methyltransferase that Contributes to Repression of Late Differentiation Genes.**

(A) Semi-quantitative RT-PCR analysis of expression of *Ezh1*, basal *keratin 14* and housekeeping *Ppib* genes in basal and suprabasal cells at indicated times. (B) Western

blotting analysis revealed upregulation of triMeK27-H3 in passaged Ezh2cKO keratinocytes. **(C)** RNAi studies revealed that Ezh1 contributes to triMeK27-H3 in Ezh2cKO cells. Semi-quantitative RT-PCR analysis showed downregulation of Ezh1 expression in keratinocytes infected with lentiviral RNAi construct against Ezh1 (shEzh1) and Western blotting revealed reduction of triMeK27-H3 in Ezh2cKOshEzh1 keratinocytes. Control is actin (unchanged) in B and C. **(D)** Semi-quantitative RT-PCR analysis revealed synergistic role for Ezh1 and Ezh2 in activation of late differentiation genes. Data are mean  $\pm$ st. dev. N=2. Asterisks indicate significance,  $p < 0.05$ . Semi-quantitative RT-PCR with primers against silenced *HoxA7* gene served as a control. **(E)** Ezh1 level is unchanged in Ezh2cKO cells *in vivo* and *in vitro* as shown by semi-quantitative RT-PCR. Semi-quantitative RT-PCR with primers against the *HPRT* gene was used for normalization in **A**, **C**, **D** and **E**. **(F)** Grafting of primary WT and Ezh2cKO cells that express sh-Ezh1-RFP failed to reconstitute skin whereas WT and cKO cells that express sh-Control-RFP led to reconstitution of skin. Abbreviations are B, basal cells; SB, suprabasal cells.

## **Supplemental Experimental Procedures**

### **Antibodies**

The following antibodies and dilutions used were  $\alpha$ 6-integrin,  $\beta$ 4-integrin (rat, 1:100; BDPharmingen), Ezh2 (rabbit, 1:400; Lake Placid Biologicals); trimethylated K27 histone H3 (rabbit, 1:100; Upstate); CD34 (rat, 1:100; Pharmingen); K5 (rabbit, 1:500; Fuchs Laboratory), AE15 (mouse, 1:50; T.T. Sun, New York University, New York), BrdU (rat, 1:100; Abcam), Filaggrin (rabbit, 1:100; Fuchs Laboratory), Loricrin (rabbit,

1:400; Fuchs Laboratory), K10 (rabbit, 1:250; Covance); Ki67 (rabbit, 1:100; Castrovina), active caspase-3 (rabbit, 1:500; R&D Systems), cJun (rabbit, 1:250, Santa Cruz), JunD (rabbit, 1:250, Santa Cruz), cFos (rabbit, 1:250, Santa Cruz), Actin (mouse, 1:1000, Sigma), H3 (rabbit, 1:1000, Abcam). Secondary Abs coupled to FITC, Alexa488, or Texas-Red were from Jackson Laboratories.

### **Immunostaining and Western Blots**

Tissues were embedded in OCT, frozen, sectioned (10  $\mu$ m) and fixed with formaldehyde for immunofluorescence microscopy. To prevent nonspecific binding with mouse monoclonal Abs, the MOM Basic Kit (Vector Laboratories) was used. Antibodies and dilutions are included in Supplementary Data. Nuclei were labeled by 4',6'-diamidino-2-phenylindole (DAPI) in conjunction with immunofluorescence microscopy. To visualize actin, FITC-coupled Phalloidin was used. Images were taken by a mot plus microscope (Axioskop 2; Carl Zeiss MicroImaging, Inc.). The objectives used were 20x NA 0.5 plan Neofluar /0.17 and 40x NA 1.3 oil plan Neofluar /0.17 (Carl Zeiss MicroImaging, Inc.).

Cell fractionation was performed using NE-PER Nuclear and Cytoplasmic Extraction Kit (Pierce). Total cell lysates were prepared by boiling for 10 minutes in EZ Lysis Buffer (60 mM Tris-HCl (pH 6.8); 10% glycerol; 2% SDS; 2%  $\beta$ -mercaptoethanol freshly added). Samples were run on 4%–12% gradient gels, transferred to nitrocellulose, and blotted overnight with the indicated Abs.

## **Histology and Electron Microscopy**

For transmission electron microscopy (TEM), samples were fixed in 2% glutaraldehyde, 4% PFA, and 2 mM CaCl<sub>2</sub> in 0.05M sodium cacodylate buffer, pH 7.2, at RT for >1 h. Samples were postfixed in either 1% osmium tetroxide or 0.2% ruthenium tetroxide and processed for Epon embedding; semi-thin sections (1 μm) were stained with toluidine blue and examined by light microscopy. For TEM, ultrathin sections (60–70 nm) were counterstained with uranyl acetate and lead citrate. EM images were taken with a transmission electron microscope (Tecnai G2-12; FEI) equipped with a digital camera (Model XR60; Advanced Microscopy Techniques, Corp.)

## **RNA Isolation and Semi-Quantitative RT-PCR**

RNAs were isolated from cells using Absolutely RNA kit (Stratagen), and DNase treatment was performed to remove genomic DNA (Absolutely RNA, Stratagene). Equal RNA amounts were added to reverse-transcriptase reaction mix (Invitrogen) with oligo-dT(12) as a primer. Semi-Quantitative PCR was conducted with a LightCycler system (Roche Diagnostics). RT-PCRs of RNA (i.e., not reverse-transcribed) were used as negative controls. Reactions were performed using the indicated primers and template mixed with the LightCycle DNA master SYBR Green kit and run for 45 cycles. Specificity of the reactions was determined by subsequent melting curve analysis. LightCycle analysis software was used to remove background fluorescence (noise band). The number of cycles needed to reach the crossing point for each sample was used to calculate the amount of each product using the  $2^{-CP}$  method. Levels of PCR product were expressed as a function of GAPDH and/or HPRT. Sequences of primers are

available upon request.

### **RNAi Constructs**

RNAi lentiviral constructs targeting Ezh1 mRNA (TRCN0000095696 and TRCN0000095698) were obtained from Open Biosystems. Selection with puromycin (2 $\mu$ g/ml) was done two days upon infection with lentiviruses and keratinocytes were collected for analysis a week after infection.

### **In Vivo Grafting Experiments**

Grafting of primary cells infected with lentiviruses that express either shControl or sh-Ezh1 vectors was done as described (Guasch et al., 2007). Briefly two days upon infection 80% infected cells were RFP positive. 1-1.5 $\times 10^6$  cells of keratinocytes and 3-5 $\times 10^6$  dermal fibroblast cells were grafted onto nude mouse in which piece of back skin was removed. Reconstitution of skin with grafted cells was analyzed 4-8 weeks later.

### **Reference**

Guasch, G., Schober, M., Pasolli, H. A., Conn, E. B., Polak, L., and Fuchs, E. (2007). Loss of TGFbeta signaling destabilizes homeostasis and promotes squamous cell carcinomas in stratified epithelia. *Cancer Cell* 12, 313-327.



**Table S1. Summary of Microarray Analysis of Changes in Gene Expression in E16 Ezh2cKO vs WT Basal Cells**

| Probe Set ID | UniGene Title                                                              | UniGene Symbol          | Mean Fold Change<br>Ezh2cKOvs WT |
|--------------|----------------------------------------------------------------------------|-------------------------|----------------------------------|
| 1453218_at   | late cornified envelope 1C // RIKEN cDNA 1110014K05 gene                   | Lce1c // 1110014K05Rik  | 10.5                             |
| 1457945_at   | Eukaryotic translation initiation factor 2, subunit 3                      | Eif2s3y                 | 7.8                              |
| 1427268_at   | filaggrin                                                                  | Flg                     | 6.7                              |
| 1420332_x_at | late cornified envelope 1D // small proline rich-like 7                    | Lce1d // Sprrl7         | 6.61                             |
| 1429565_s_at | late cornified envelope 1M // late cornified envelope 5A                   | Lce1m // Lce5a          | 5.42                             |
| 1451612_at   | metallothionein 1                                                          | Mt1                     | 5.07                             |
| 1436277_at   | ring finger protein 207 // RIKEN cDNA 330010C22 gene                       | Rnf207 // D330010C22Rik | 4.95                             |
| 1457396_at   | ---                                                                        | ---                     | 4.9                              |
| 1453092_at   | Cysteine-rich C-terminal 1 // RIKEN cDNA 2300002G24 gene                   | Crct1 // 2300002G24Rik  | 4.87                             |
| 1456787_at   | ---                                                                        | ---                     | 4.64                             |
| 1419231_s_at | keratin complex 1, acidic, gene 12                                         | Krt1-12                 | 4.39                             |
| 1419409_at   | Late cornified envelope 1B // small proline rich-like 5                    | Lce1b // Sprrl5         | 4.2                              |
| 1420350_at   | Late cornified envelope 1A2 // small proline rich-like 2                   | Lce1a2 // Sprrl2        | 4.1                              |
| 1420676_at   | Late cornified envelope 1A1 // small proline rich-like 3                   | Lce1a1 // Sprrl3        | 3.95                             |
| 1457823_at   | cysteine rich protein 61                                                   | Cyr61                   | 3.54                             |
| 1420517_at   | Chromatin modifying protein 4C // RIKEN cDNA 2310010I16 gene               | Chmp4c // 2310010I16Rik | 3.25                             |
| 1420677_x_at | Late cornified envelope 1A1 // small proline rich-like 3                   | Lce1a1 // Sprrl3        | 3.15                             |
| 1449984_at   | chemokine (C-X-C motif) ligand 2                                           | Cxcl2                   | 3.06                             |
| 1434353_at   | Scm-like with four mbt domains 2                                           | Sfmbt2                  | 3.05                             |
| 1437777_at   | activating transcription factor 2                                          | Atf2                    | 3.05                             |
| 1442340_x_at | cysteine rich protein 61                                                   | Cyr61                   | 2.99                             |
| 1451613_at   | homerin                                                                    | Hrnr                    | 2.98                             |
| 1420741_x_at | Late cornified envelope 1I // RIKEN cDNA 2310069N01 gene                   | Lce1i // 2310069N01Rik  | 2.97                             |
| 1422860_at   | neurotensin                                                                | Nts                     | 2.97                             |
| 1453599_at   | Tripartite motif-containing 71 // RIKEN cDNA 2610206G21 gene               | Trim71 // 2610206G21Rik | 2.85                             |
| 1451854_a_at | shroom                                                                     | Shrm                    | 2.82                             |
| 1422134_at   | FBJ osteosarcoma oncogene B                                                | Fosb                    | 2.79                             |
| 1428980_at   | Keratinocyte expressed, proline-rich // RIKEN cDNA 1110001M24 gene         | Kprp // 1110001M24Rik   | 2.79                             |
| 1458980_at   | ---                                                                        | ---                     | 2.78                             |
| 1455865_at   | insulinoma-associated 1                                                    | Insm1                   | 2.78                             |
| 1438841_s_at | arginase type II                                                           | Arg2                    | 2.75                             |
| 1441793_at   | ring finger protein 39                                                     | Rnf39                   | 2.72                             |
| 1421882_a_at | ELAV (embryonic lethal, abnormal vision, Drosophila)-like 2 (Hu antigen B) | Elavl2                  | 2.7                              |

|              |                                                                                                                                                                                                 |                            |      |
|--------------|-------------------------------------------------------------------------------------------------------------------------------------------------------------------------------------------------|----------------------------|------|
| 1434526_at   | abhydrolase domain containing 7                                                                                                                                                                 | Abhd7                      | 2.7  |
| 1453202_at   | RIKEN cDNA E330016A19 gene                                                                                                                                                                      | E330016A19Rik              | 2.65 |
| 1455626_at   | homeo box A9                                                                                                                                                                                    | Hoxa9                      | 2.6  |
| 1458088_at   | Ubiquitin-associated protein 2                                                                                                                                                                  | Ubap2                      | 2.6  |
| 1457404_at   | Nuclear factor of kappa light polypeptide gene enhancer in B-cells inhibitor, zeta                                                                                                              | Nfkbiz                     | 2.6  |
| 1440681_at   | cholinergic receptor, nicotinic, alpha polypeptide 7                                                                                                                                            | Chrna7                     | 2.59 |
| 1437695_at   | prokineticin receptor 2                                                                                                                                                                         | Prokr2                     | 2.58 |
| 1420183_at   | Loricrin                                                                                                                                                                                        | Lor                        | 2.58 |
| 1428706_at   | proline-rich polypeptide 6                                                                                                                                                                      | Prr6                       | 2.53 |
| 1449799_s_at | plakophilin 2                                                                                                                                                                                   | Pkp2                       | 2.52 |
| 1437460_x_at | Ras and Rab interactor 1                                                                                                                                                                        | Rin1                       | 2.46 |
| 1440490_at   | Membrane protein, palmitoylated 6 (MAGUK p55 subfamily member 6)                                                                                                                                | Mpp6                       | 2.45 |
| 1449499_at   | homeo box A7                                                                                                                                                                                    | Hoxa7                      | 2.39 |
| 1417414_at   | septin 3                                                                                                                                                                                        | Sepetin3                   | 2.37 |
| 1433699_at   | tumor necrosis factor, alpha-induced protein 3                                                                                                                                                  | Tnfaip3                    | 2.35 |
| 1447882_x_at | DEAD (Asp-Glu-Ala-Asp) box polypeptide 54                                                                                                                                                       | Ddx54                      | 2.35 |
| 1434092_at   | nitric oxide synthase 3 antisense gene model 784, (NCBI)                                                                                                                                        | Nos3as<br>Gm784            | 2.33 |
| 1456326_at   | RIKEN cDNA E330016A19 gene                                                                                                                                                                      | E330016A19Rik              | 2.33 |
| 1440299_at   | RIKEN cDNA C130002M15 gene                                                                                                                                                                      | C130002M15Rik              | 2.33 |
| 1441044_at   | RIKEN cDNA C130002M15 gene                                                                                                                                                                      | C130002M15Rik              | 2.33 |
| 1449290_at   | dihydropyrimidinase-like 5                                                                                                                                                                      | Dpysl5                     | 2.32 |
| 1453486_a_at | signal peptide, CUB domain, EGF-like 2                                                                                                                                                          | Scube2                     | 2.32 |
| 1447932_at   | ---                                                                                                                                                                                             | ---                        | 2.32 |
| 1418536_at   | similar to H-2 class I histocompatibility antigen, Q7 alpha chain precursor (QA-2 antigen) /// region containing histocompatibility 2, Q region locus 9; histocompatibility 2, Q region locus 7 | LOC630509 ///<br>LOC674192 | 2.3  |
| 1448745_s_at | loricrin                                                                                                                                                                                        | Lor                        | 2.29 |
| 1418655_at   | beta-1,4-N-acetyl-galactosaminyl transferase 1                                                                                                                                                  | B4galnt1                   | 2.29 |
| 1457644_s_at | chemokine (C-X-C motif) ligand 1                                                                                                                                                                | Cxcl1                      | 2.28 |
| 1446805_at   | Gamma-aminobutyric acid (GABA-A) receptor, subunit alpha 2                                                                                                                                      | Gabra2                     | 2.28 |
| 1435193_at   | RIKEN cDNA A230050P20 gene                                                                                                                                                                      | A230050P20Rik              | 2.28 |
| 1439878_at   | involucrin                                                                                                                                                                                      | Ivl                        | 2.26 |
| 1451846_at   | nebulette                                                                                                                                                                                       | Nebi                       | 2.22 |
| 1433579_at   | transmembrane protein 30B                                                                                                                                                                       | Tmem30b                    | 2.19 |
| 1419810_x_at | Rho GTPase activating protein 9                                                                                                                                                                 | Arhgap9                    | 2.19 |
| 1418203_at   | phorbol-12-myristate-13-acetate-induced protein 1                                                                                                                                               | Pmaip1                     | 2.18 |
| 1448459_at   | Kv channel-interacting protein 1                                                                                                                                                                | Kcni1                      | 2.17 |
| 1417932_at   | interleukin 18                                                                                                                                                                                  | Il18                       | 2.1  |
| 1434848_at   | Transcribed locus                                                                                                                                                                               | ---                        | 2.1  |
| 1449612_x_at | M-phase phosphoprotein 1                                                                                                                                                                        | Mphosph1                   | 2.09 |
| 1428209_at   | brain expressed gene 4                                                                                                                                                                          | Bex4                       | 2.09 |
| 1449319_at   | R-spondin homolog (Xenopus)                                                                                                                                                                     | Rspo1                      | 2.09 |

|              |                                                                                                                                |                                    |      |
|--------------|--------------------------------------------------------------------------------------------------------------------------------|------------------------------------|------|
| 1458367_at   | laevis)<br>gene model 94, (NCBI)                                                                                               | Gm94                               | 2.08 |
| 1443772_at   | ---                                                                                                                            | ---                                | 2.08 |
| 1420437_at   | indoleamine-pyrrole 2,3<br>dioxygenase                                                                                         | Indo                               | 2.07 |
| 1417946_at   | abhydrolase domain containing 3                                                                                                | Abhd3                              | 2.07 |
| 1459672_at   | Topoisomerase (DNA) I                                                                                                          | Top1                               | 2.07 |
| 1426620_at   | carbohydrate sulfotransferase 10                                                                                               | Chst10                             | 2.07 |
| 1448733_at   | B lymphoma Mo-MLV insertion<br>region 1                                                                                        | Bmi1                               | 2.07 |
| 1423952_a_at | keratin complex 2, basic, gene 7                                                                                               | Krt2-7                             | 2.06 |
| 1449451_at   | serine (or cysteine) peptidase<br>inhibitor, clade B (ovalbumin),<br>member 11                                                 | Serpinb11                          | 2.05 |
| 1427683_at   | early growth response 2                                                                                                        | Egr2                               | 2.05 |
| 1448830_at   | dual specificity phosphatase 1                                                                                                 | Dusp1                              | 2.04 |
| 1437667_a_at | BTB and CNC homology 2                                                                                                         | Bach2                              | 2.03 |
| 1424948_x_at | histocompatibility 2, D region locus<br>1 /// histocompatibility 2, K1, K<br>region /// MHC (A.CA/J(H-2K-f)<br>class I antigen | H2-D1 /// H2-K1 ///<br>LOC56628    | 2.03 |
| 1448932_at   | keratin complex 1, acidic, gene 16                                                                                             | Krt1-16                            | 2.02 |
| 1429230_at   | kallikrein 5                                                                                                                   | Klk5                               | 2.02 |
| 1446290_at   | RIKEN cDNA 2410129H14 gene                                                                                                     | 2410129H14Rik                      | 2.02 |
| 1422865_at   | runt related transcription factor 1                                                                                            | Runx1                              | 2.01 |
| 1455898_x_at | solute carrier family 2 (facilitated<br>glucose transporter), member 3                                                         | Slc2a3                             | 2.01 |
| 1447339_at   | Transcribed locus                                                                                                              | ---                                | 2.01 |
| 1417312_at   | dickkopf homolog 3 (Xenopus<br>laevis)                                                                                         | Dkk3                               | 2.01 |
| 1419700_a_at | prominin 1                                                                                                                     | Prom1                              | 2.01 |
| 1424984_at   | RIKEN cDNA 2700078E11 gene                                                                                                     | 2700078E11Rik                      | 0.49 |
| 1419171_at   | RIKEN cDNA 2310044D20 gene                                                                                                     | 2310044D20Rik                      | 0.49 |
| 1427262_at   | inactive X specific transcripts                                                                                                | Xist                               | 0.48 |
| 1439620_at   | ---                                                                                                                            | ---                                | 0.48 |
| 1438462_x_at | ---                                                                                                                            | ---                                | 0.48 |
| 1460039_at   | C-type lectin domain family 1,<br>member a                                                                                     | Clec1a                             | 0.48 |
| 1434186_at   | G protein-coupled receptor 23                                                                                                  | Gpr23                              | 0.48 |
| 1443541_at   | Hypothetical gene supported by<br>AK039231; AK039519; AK039710;<br>AK045832                                                    | LOC381438                          | 0.48 |
| 1449347_a_at | X-linked lymphocyte-regulated 4B<br>/// X-linked lymphocyte-regulated<br>4A /// X-linked lymphocyte-<br>regulated 4E           | Xlr4b /// Xlr4a /// Xlr4e          | 0.48 |
| 1453319_at   | cell division cycle and apoptosis<br>regulator 1                                                                               | Ccar1                              | 0.47 |
| 1425890_at   | lymphocyte antigen 6 complex,<br>locus I                                                                                       | Ly6i                               | 0.47 |
| 1451602_at   | sorting nexin 6                                                                                                                | Snx6                               | 0.46 |
| 1444121_at   | Transcribed locus                                                                                                              | ---                                | 0.46 |
| 1452406_x_at | erythroid differentiation regulator 1                                                                                          | Erdr1                              | 0.46 |
| 1426558_x_at | RIKEN cDNA 3100002L24 gene ///<br>similar to zinc finger protein 14 ///                                                        | 3100002L24Rik ///<br>LOC627901 /// | 0.46 |

|              |                                                                                                                                            |                   |      |
|--------------|--------------------------------------------------------------------------------------------------------------------------------------------|-------------------|------|
|              | RIKEN cDNA 0610010B08 gene ///                                                                                                             | 0610010B08Rik /// |      |
|              | similar to zinc finger protein 91 ///                                                                                                      | LOC628084 ///     |      |
|              | similar to zinc finger protein 709 ///                                                                                                     | LOC628147 ///     |      |
|              | similar to gonadotropin inducible<br>ovarian transcription factor 1 ///                                                                    | LOC668030 ///     |      |
|              | similar to zinc finger protein 97 ///                                                                                                      | LOC668039 ///     |      |
|              | similar to gonadotropin inducible<br>ovarian transcription factor 1                                                                        | LOC668066         |      |
| 1458438_at   | RIKEN cDNA 4933415L06 gene                                                                                                                 | 4933415L06Rik     | 0.45 |
| 1434340_at   | ---                                                                                                                                        | ---               | 0.44 |
| 1439396_x_at | glycerol-3-phosphate<br>dehydrogenase 1 (soluble)                                                                                          | Gpd1              | 0.43 |
| 1441388_at   | Adult male hippocampus cDNA,<br>RIKEN full-length enriched library,<br>clone:C630020O05<br>product:unclassifiable, full insert<br>sequence | ---               | 0.42 |
| 1431503_at   | RIKEN cDNA 4930513O06 gene                                                                                                                 | 4930513O06Rik     | 0.42 |
| 1418094_s_at | carbonic anhydrase 4                                                                                                                       | Car4              | 0.4  |
| 1439200_x_at | ---                                                                                                                                        | ---               | 0.39 |
| 1460256_at   | carbonic anhydrase 3                                                                                                                       | Car3              | 0.39 |
| 1447815_x_at | RIKEN cDNA 6430527G18 gene                                                                                                                 | 6430527G18Rik     | 0.36 |
| 1422651_at   | adiponectin, C1Q and collagen<br>domain containing                                                                                         | Adipoq            | 0.34 |
| 1458219_at   | breast carcinoma amplified<br>sequence 2                                                                                                   | Bcas2             | 0.34 |
| 1416544_at   | enhancer of zeste homolog 2<br>(Drosophila)                                                                                                | Ezh2              | 0.28 |
| 1449434_at   | carbonic anhydrase 3                                                                                                                       | Car3              | 0.27 |
| 1439716_at   | piwi-like homolog 4 (Drosophila)                                                                                                           | Piwil4            | 0.27 |

**Table S2. Primers**

Below are sequences of the primers that were used for Semi-Quantitative PCR. Please note that for ChIP assay (if not indicated otherwise) primers span the transcriptional start site of a gene.

|            | Assay     | Forward primer               | Reverse Primer               |
|------------|-----------|------------------------------|------------------------------|
| Ezh1       | RT-QPCR   | TCAGTGGCAACATGCCTAAGC        | GCCTAGATTAGGCCAGCTACC        |
| Ezh2       | RT-QPCR   | CATTCATACGCTCTTCTGTGCGAC     | CCCTCCAGATGCTGGTAACACT       |
| Eed        | RT-QPCR   | CCCTCTGGTGTGTTGCAACTGT       | CATCTGCATCAGCATCTACATAGGA    |
| Bmi1       | RT-QPCR   | GCAATGACTGTGATGCACTTGA       | AAGGTAGTGGGCCATTTCTTCTC      |
| Cbx2       | RT-QPCR   | AACACGTCTTTGTACGATGTC        | CAGGTCAGGCATCAAAGCAA         |
| Pcgf2      | RT-QPCR   | CAACGGCTCCAACGAGGA           | GTCCCTGACGCCTTCGTAGA         |
| Ring1a     | RT-QPCR   | GCCGATGCCTGGATCTGAT          | GGGCGAGTCAGAGCTTACAT         |
| HPRT       | RT-QPCR   | GATCACTCAACGGGGACATAAA       | CTTGCGCTCATCTTAGGCTTTGT      |
| Ppib       | RT-QPCR   | GTGAGCGCTTCCAGATGAGA         | TGCCGGAGTCGACAATGATG         |
| Myod1      | RT-QPCR   | GCTCAAACCCCAATGCGAT          | AACGGCTTCGAAAGGACAGTT        |
| Olig2      | RT-QPCR   | AAAATAGCACTTGTGGAATGGAATAATC | AAGAAACCAATTGATGTGTGCTTAGA   |
| HoxB13     | RT-QPCR   | CCCAAAGGCCAAATGACATAA        | CCCTTCAATACACCTCAGTCAA       |
| K14        | RT-QPCR   | CGCCGCCCTGGTGTGG             | ATCTGGCGGTTGGTGGAGGTCA       |
| K5         | RT-QPCR   | AACATTTGGGGTCTGGGTAC         | GGCCACAGAGACTGCTTCTTT        |
| $\alpha$ 6 | RT-QPCR   | CTGGACACCCGCGAGGACAAC        | TCAACCGGCCATCGCAGAAACT       |
| $\beta$ 4  | RT-QPCR   | GGGGCCGAGAGCGAGAGGGTGTGTC    | CGTGGTGTGTGCGTGTGCTGGTCA     |
| K1         | RT-QPCR   | GACACCACAACCCGACCCAAAACCTTAG | ATACTGGGCCTTGACTTCCGAGATGATG |
| K10        | RT-QPCR   | GGAGGGTAAAATCAAGGAGTGGTA     | TCAATCTGCAGCAGCACGTT         |
| Lor        | RT-QPCR   | TCACTCATCTTCCCTGGTGTCTT      | GTCTTTCCACAACCCACAGGA        |
| Inv        | RT-QPCR   | GTCCGGTCTCCAATTCGTGTTT       | GCAATTGGAAGAGAAGCAGCATCAG    |
| Lce1a1     | RT-QPCR   | CACTTTAGACAAACCATTGAGAGAA    | CCAAGAAGACAACCCAGCAA         |
| Lce1a2     | RT-QPCR   | GAGGTGCCCAAGGATCTTGAC        | CCAGGCTACAGCAGGAAGACAC       |
| Lce1c      | RT-QPCR   | AGATCTCAAACATTCTATGCAGAGGAA  | TCACAAAATACTGAAGAAGAAAGGGATT |
| Lce1d      | RT-QPCR   | GACTGCTGCTGATCTCAATGAGAA     | TGCAGAACTTTCCCTGAAGATTTTC    |
| Lce1l      | RT-QPCR   | CATGAAGGCTTCAGACAAGCAAT      | TTGGAATCACAGAAGGAGATGAGAC    |
| Lce1m      | RT-QPCR   | AGCATTGACTGAAGACCTGCAA       | GCAAAGCCAATGCATCTCAGA        |
| Crct1      | RT-QPCR   | ACTGCACTTTGATGTTTCAGAACTTC   | CAGGAGGCCTGTTTTGAACACT       |
| Flg        | RT-QPCR   | GGAGGCATGGTGGAACTGA          | TGTTTATCTTTTCCCTCACTTCTACATC |
| HoxA7      | RT-QPCR   | AAAATTCAGGAGATGGCAGTGT       | CAGGGAAAATATACGACTGCTGCT     |
| cJun       | RT-QPCR   | AAGCGCAAAACTCCGAGCT          | CATGAGTTGGCACCCACTGT         |
| JunB       | RT-QPCR   | GGAGGACAAGGTGAAGACACTCA      | GGCAAGGGAGGCTCTCAGA          |
| JunD       | RT-QPCR   | GACACGCAAGAACGCATCAA         | TTGACGTGGCTGAGGACTTTTC       |
| cFos       | RT-QPCR   | TGGCCCTGTGAGCAGTCA           | AGCCTGGTGTGTTTCACGAAC        |
| FosB       | RT-QPCR   | TGACGGCTTCTCTTTACACACA       | GGAGGGAGGGCGAGTTCA           |
| Fra2       | RT-QPCR   | GCCCTAGGAGGGTGCCTCTA         | TCCATAGCAGCAAGCTCCTACC       |
| Ink4A      | RT-QPCR   | GTGTGCATGACGTGCGGG           | GCAGTTCGAATCTGCACCGTAG       |
| Ink4B      | RT-QPCR   | CCCTGTGAACTGAAAATGCAGA       | TGTCGAGCTGGAGGTGACTTC        |
| Myod1      | ChIP-QPCR | ACTCTCACGGCTTGGGTTGA         | GAGTCGAAACACGGGTCATCA        |
| Olig2      | ChIP-QPCR | TGCTTATTACAGACCGAGCCAAC      | CTAAATCCTAGCCACTTTGGAGAAGT   |
| Olig3      | ChIP-QPCR | ACCATCAGGAGAGTCTGCTGAACT     | GAAGATCCTGCTCCGACAGCT        |
| Neurog1    | ChIP-QPCR | CCGGTCTGTACGGACAGTAA         | TCGGTGAGGAAGCTGCACA          |
| Neurog2    | ChIP-QPCR | CAGATCTGATTGTTTTCTTGGTGGTATA | GCGTGGTTGTCTGTGCTCAGT        |
| HoxB13     | ChIP-QPCR | TCTGGAAAGCAGCGTTTTGC         | CTTAGTGATAAACTTGTGGCTGCA     |
| HoxA11     | ChIP-QPCR | CTGCAGTGGAGAATCATGTTAAGC     | AGAAGGGAGGCTGGAGAAATCT       |
| HoxD10     | ChIP-QPCR | TTTTCTAGCGATGTCAGCCTAC       | TGCTCGAATAAAAACCTGCTACTCT    |

|                       |           |                             |                              |
|-----------------------|-----------|-----------------------------|------------------------------|
| K14                   | ChIP-QPCR | AGGAGGGATCTGATCGGGAGT       | AGAGCTGCTCAGGTGTGTTAGAAAA    |
| K5                    | ChIP-QPCR | GTTGAACGCCGCTGACCT          | CTTCGGAAGGACACACTGGAC        |
| Actb1                 | ChIP-QPCR | CCGTAAGACCTCTATGCCAACAC     | GCTAGGAGCCAGAGCAGTAATCTC     |
| K1                    | ChIP-QPCR | CTCAGTATATAAGGGCACGGCACT    | GACTCATGATGCCTTAGAGAGAGGT    |
| K10                   | ChIP-QPCR | AGCAAAGCCTAGCACCTGTGA       | GCTGCTGGAGCTGTATAGAACAGAC    |
| Lor (TSS,<br>AP1site) | ChIP-QPCR | CAGAGCAGGACAAGAGTATAAAACACA | GCCCACACTTACCTGAAGCAC        |
| Lor(-500)             | ChIP-QPCR | GGGACTCATGAACTCTCACAACC     | CCATCTCTCTTATGCCACAATTTCT    |
| Lor(+700)             | ChIP-QPCR | AGGACCACAGTAGAGCTGTCTTGTCT  | GCATTTCTGCATAAAGTCCTTAGTT    |
| Lor(+2000)            | ChIP-QPCR | GCGCCGATGGGCTTAACT          | CTTGAGCGACTCAATGGCTTC        |
| Flg                   | ChIP-QPCR | TCCCTTTTACAGGTGCATACACAC    | CCTCCTTACTACTGGTTGAGTATTGTT  |
| Flg(-1400)            | ChIP-QPCR | CCCCTTGTGAAAAGGTCAA         | CAGGTTTGGCAGGTGCTGTA         |
| Flg(+600)             | ChIP-QPCR | GTGATGCCCAGGGAAGACA         | TGTCTGCTCCCACAATGAAGC        |
| Lce1a2                | ChIP-QPCR | GAGGTGCCCAAGGATCTTGTAC      | CCTTCCCCAACACTTCCAT          |
| Lce1m                 | ChIP-QPCR | AGCATTGACTGAAGACCTGCAA      | GCAAAGCCAATGCATCTCAGA        |
| Lce1i                 | ChIP-QPCR | TCCTGGAGTAAGGGCAGAGA        | CAAGGCTGTGGCTAGTTATTGTCA     |
| Lce3b                 | ChIP-QPCR | AAAGCATCCTCAGACACGGACTT     | CCTATTGCACTTATGTCTGGATTTCTGT |
| Crct1                 | ChIP-QPCR | TCTGCCTAGCAGGTGTCAAGTTC     | GCTACATTCTGGCTGCATCCTACT     |
| Ch5IN                 | ChIP-QPCR | CCCTCATCACAGACCCACTTCT      | GTGGGAGTGGATGTATCTCTGACTT    |
| Ch3IN                 | ChIP-QPCR | TGTCTGGAATGTGGTGGTTTGA      | GCCCACTGCTATAATTAGGAAGGA     |
| Ch8IN                 | ChIP-QPCR | AAGGGCCCTCTGCTTAAAAA        | AGAGCTCCATGGCAGGTAGA         |
| Sprrr1a               | ChIP-QPCR | GGTGCTGCCTACAGTTAGTGAACAGTA | TGAATATTTGAATGGAGGTTTCCTTT   |
| Sprrr2f               | ChIP-QPCR | TCTTTGAAAGGCCATATACCTCAGC   | GTTCTGGTGCCTGAGAAACC         |
| Sprrr2h               | ChIP-QPCR | TGGTTCAAACCTCTGAGCAAGTGTA   | CCTGTATATCAAGAGAGGGGCATCAGAT |
| K5<br>(AP1site)       | ChIP-QPCR | GGAGGCTGGCAGAGCAGTC         | AGCCCTTACAGTCCCTCCTA         |
| Lce1c (AP1<br>site)   | ChIP-QPCR | CCACAGATCTTGTGCTACCCTTC     | TGCCTAACCTCACATTTGAACAT      |
| Lce1a2<br>(AP1 site)  | ChIP-QPCR | ACAAGAGCATGGCCTGTACCA       | TACCCAGCTCCTTCTACTGCTTTC     |
| Crct1(AP1<br>site)    | ChIP-QPCR | GAAGGACAGGCAAGAAAGAAGGT     | CGCAGCTCTTTCAAGTGGAATCT      |
| Lce1m<br>(AP1 site)   | ChIP-QPCR | GAGGGAGGAATTAGATCTTTGGGAT   | AGTAATGGATTGAGGTGCTATGAGAA   |
